# Supplementary material for: First total synthesis of the marine natural products clavulolactones II and III
Source: Royal Society of Chemistry journal article supplement (doi:10.1039/c5ob00074b), 2015-01-01

**First total synthesis of the marine natural products clavulolactones II and III.**

**Supporting Information**

Charlotte M. Miller<sup>a</sup>, Tore Benneche<sup>a\*</sup> and Marcus A. Tius<sup>b</sup>

<sup>a</sup>Department of Chemistry, University of Oslo, Blindern, 0315 Oslo, Norway. <sup>b</sup>Department of Chemistry, 2545 The Mall, University of Hawaii, Honolulu, Hawaii 96822, USA.

# <sup>1</sup>H and <sup>13</sup>C NMR spectra

CM-2-131-4.10.fid

PROTON CDCl<sub>3</sub> {D:\uio\AVII400-05} charlomm 119

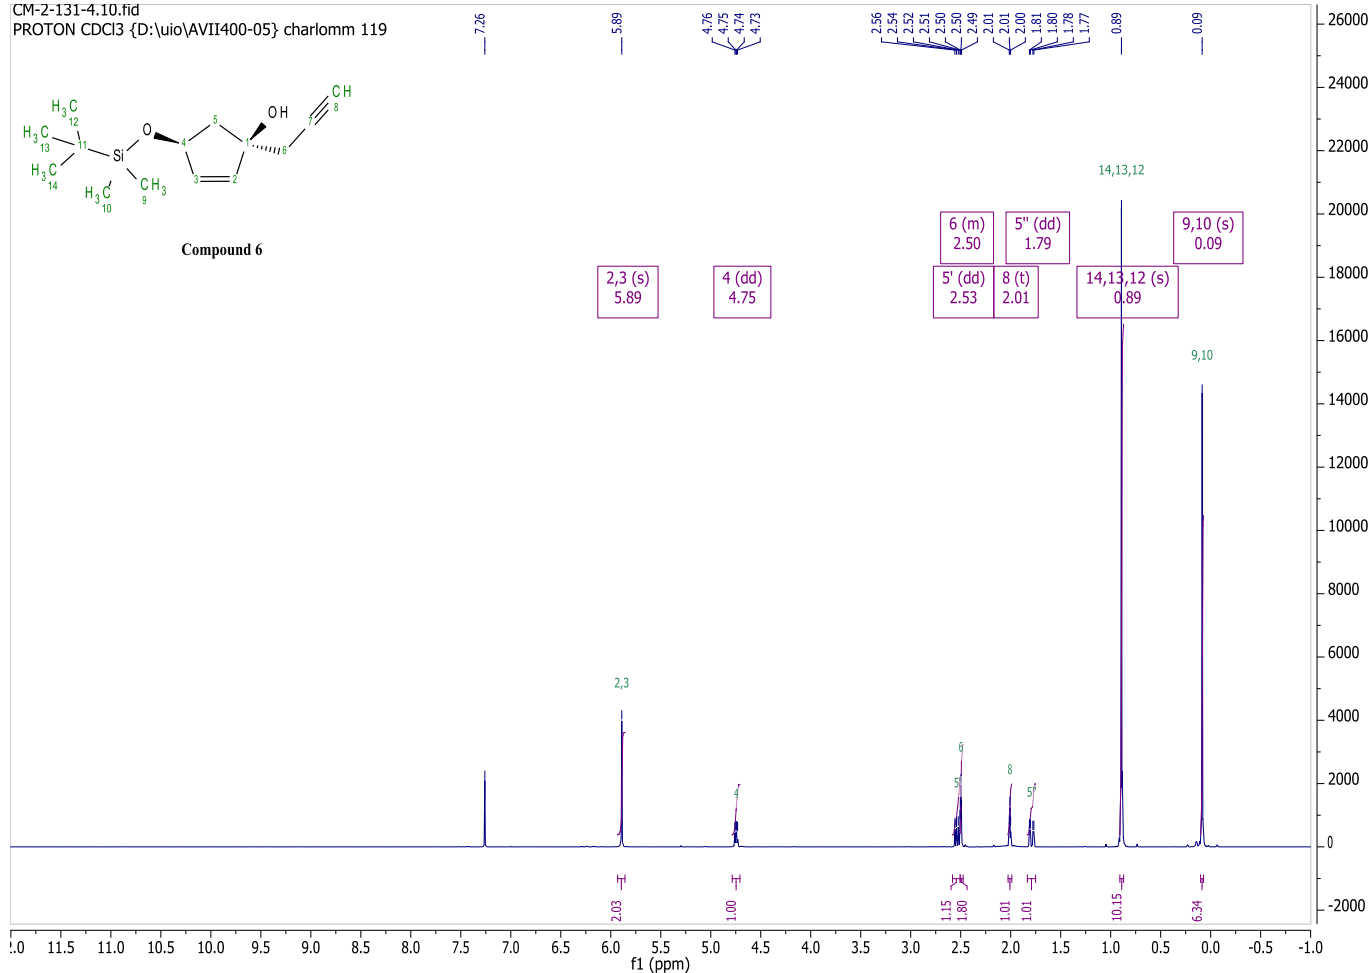

CM-1-35-3.12.fid

C13CPD CDCl<sub>3</sub> {D:\uio\AVII400-05} charlomm 117

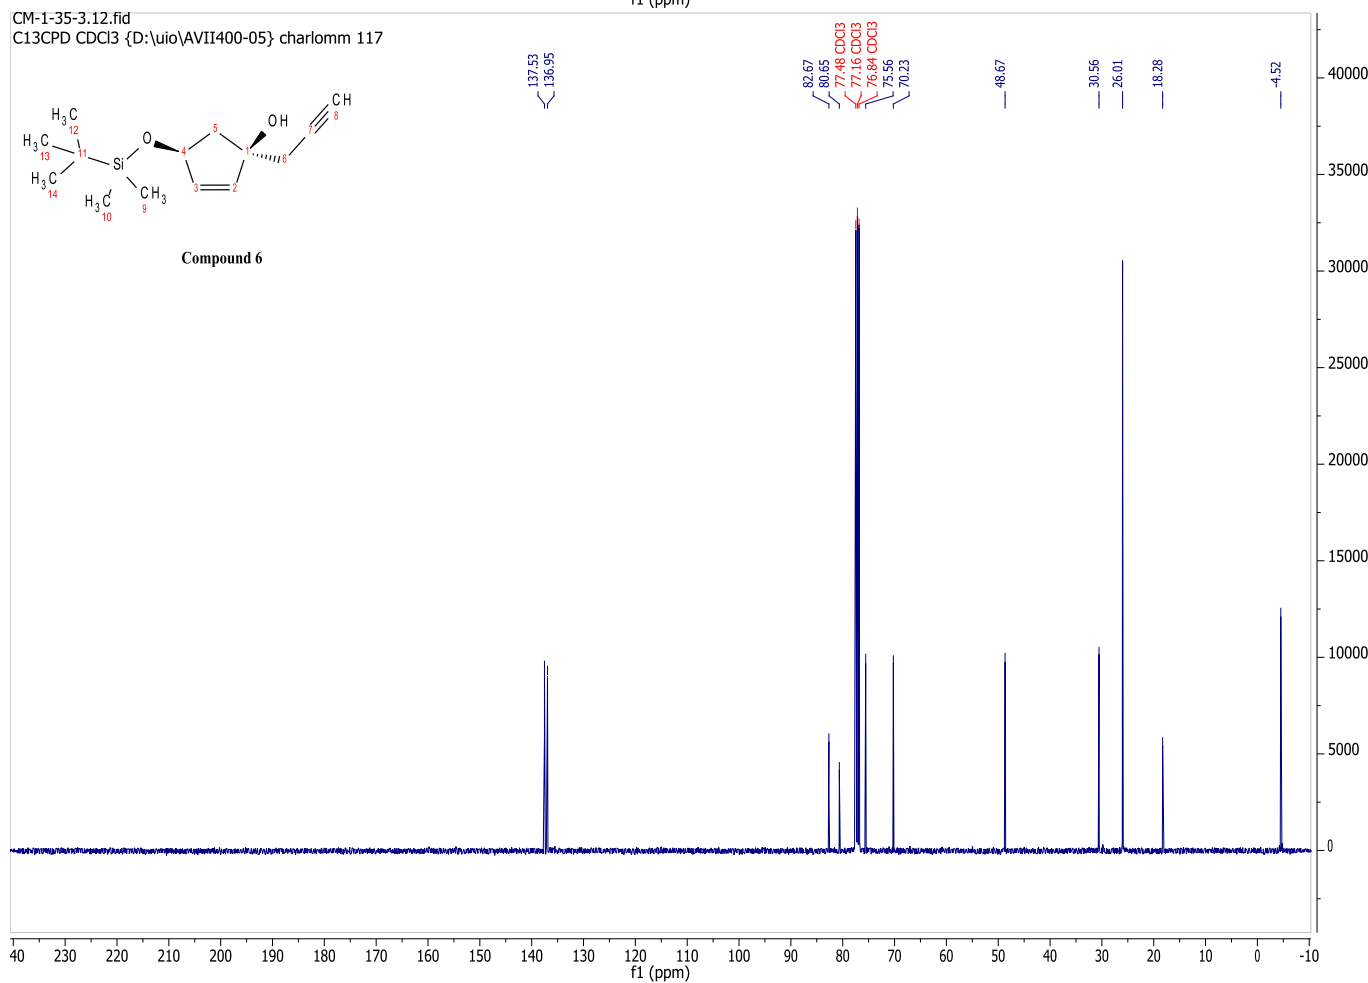

CM-2-78-2.10.fid  
 PROTON CDCl3 {D:\uio\AVII400-05} charlomm 20

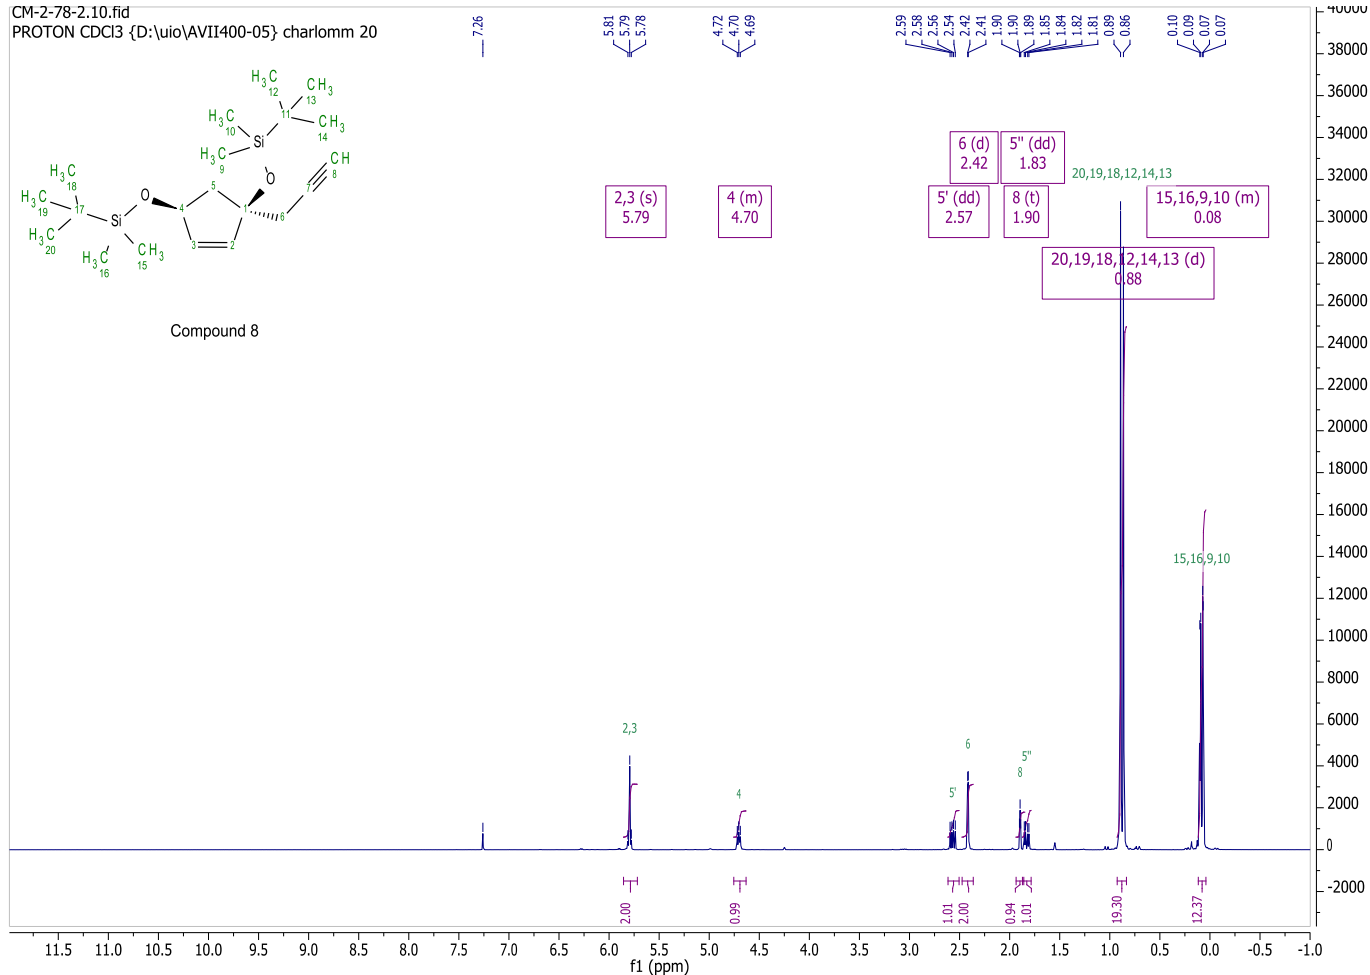

CM-2-78-2.12.fid  
 C13CPD CDCl3 {D:\uio\AVII400-05} charlomm 20

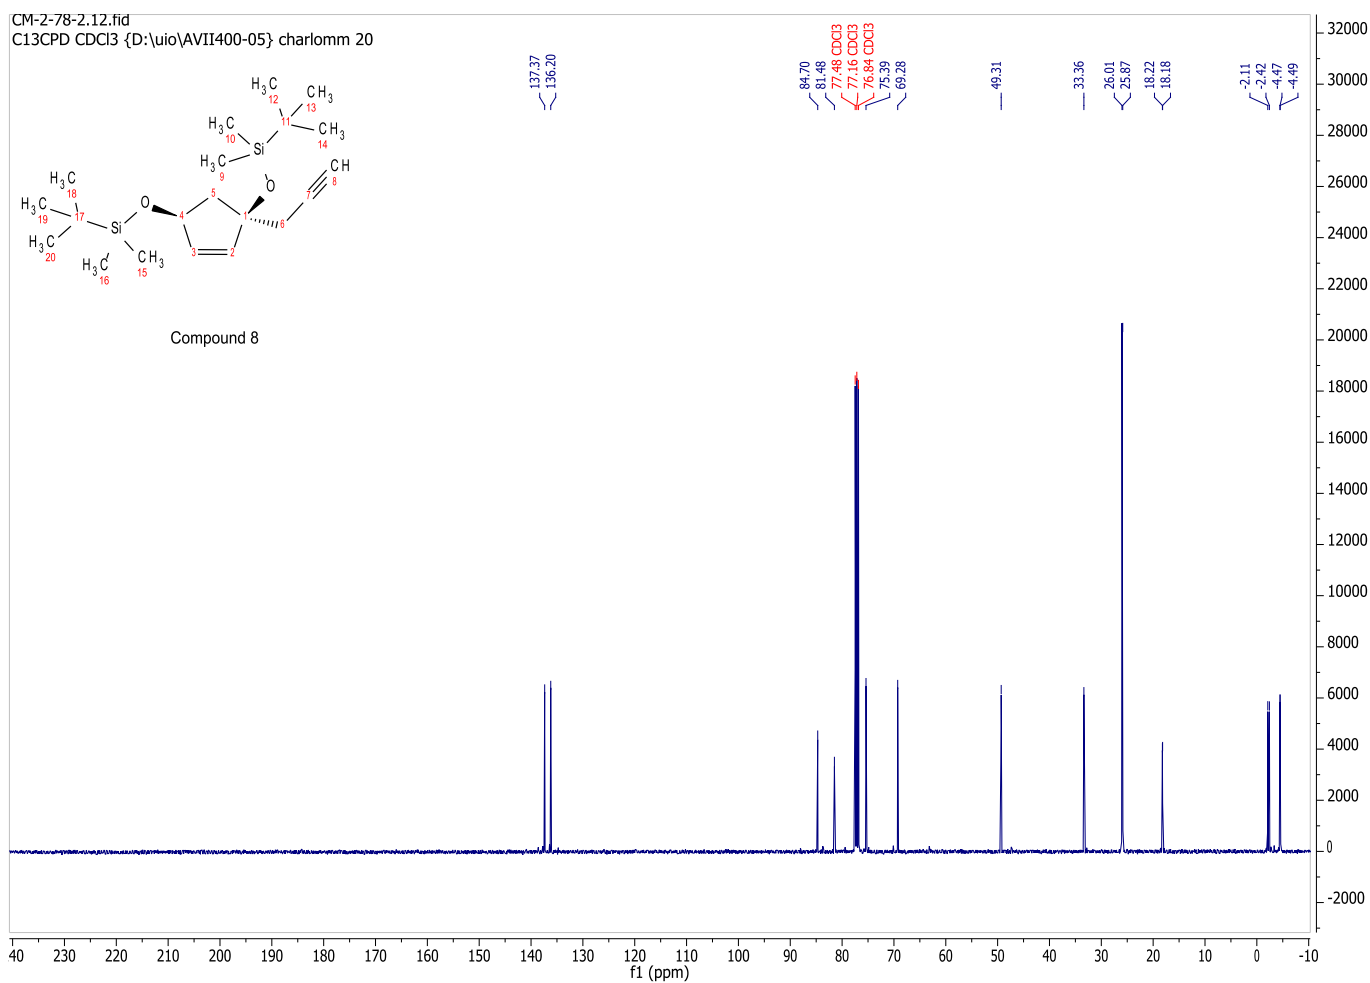

CM-4-269-2.10.fid  
 PROTON CDCl3 {D:\uio\DPX300-09} charlomm 12

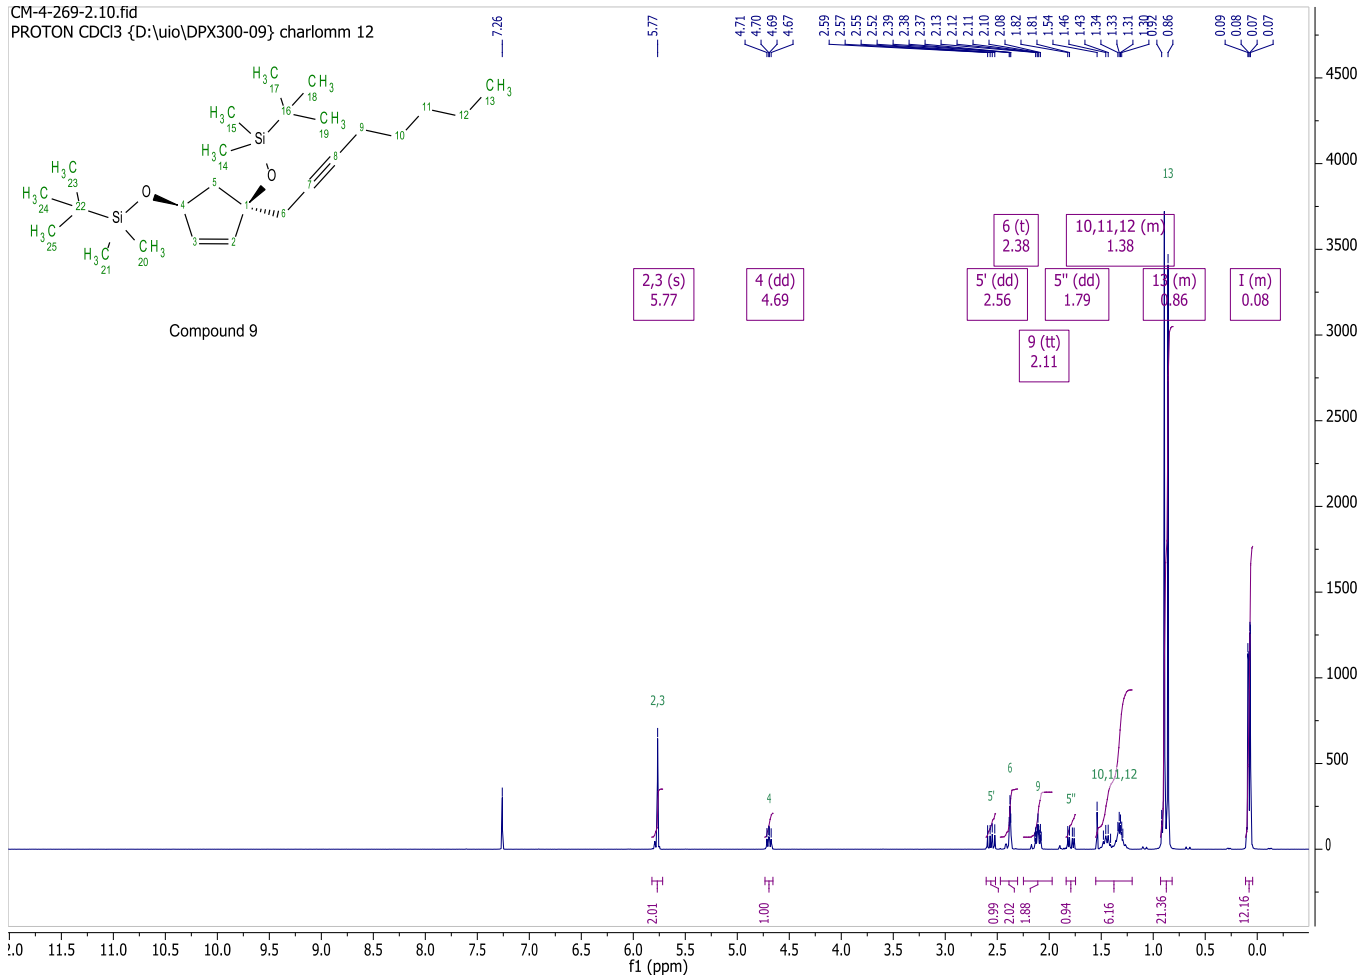

CM-4-269-2.11.fid  
 C13CPD CDCl3 {D:\uio\AVII400-05} charlomm 77

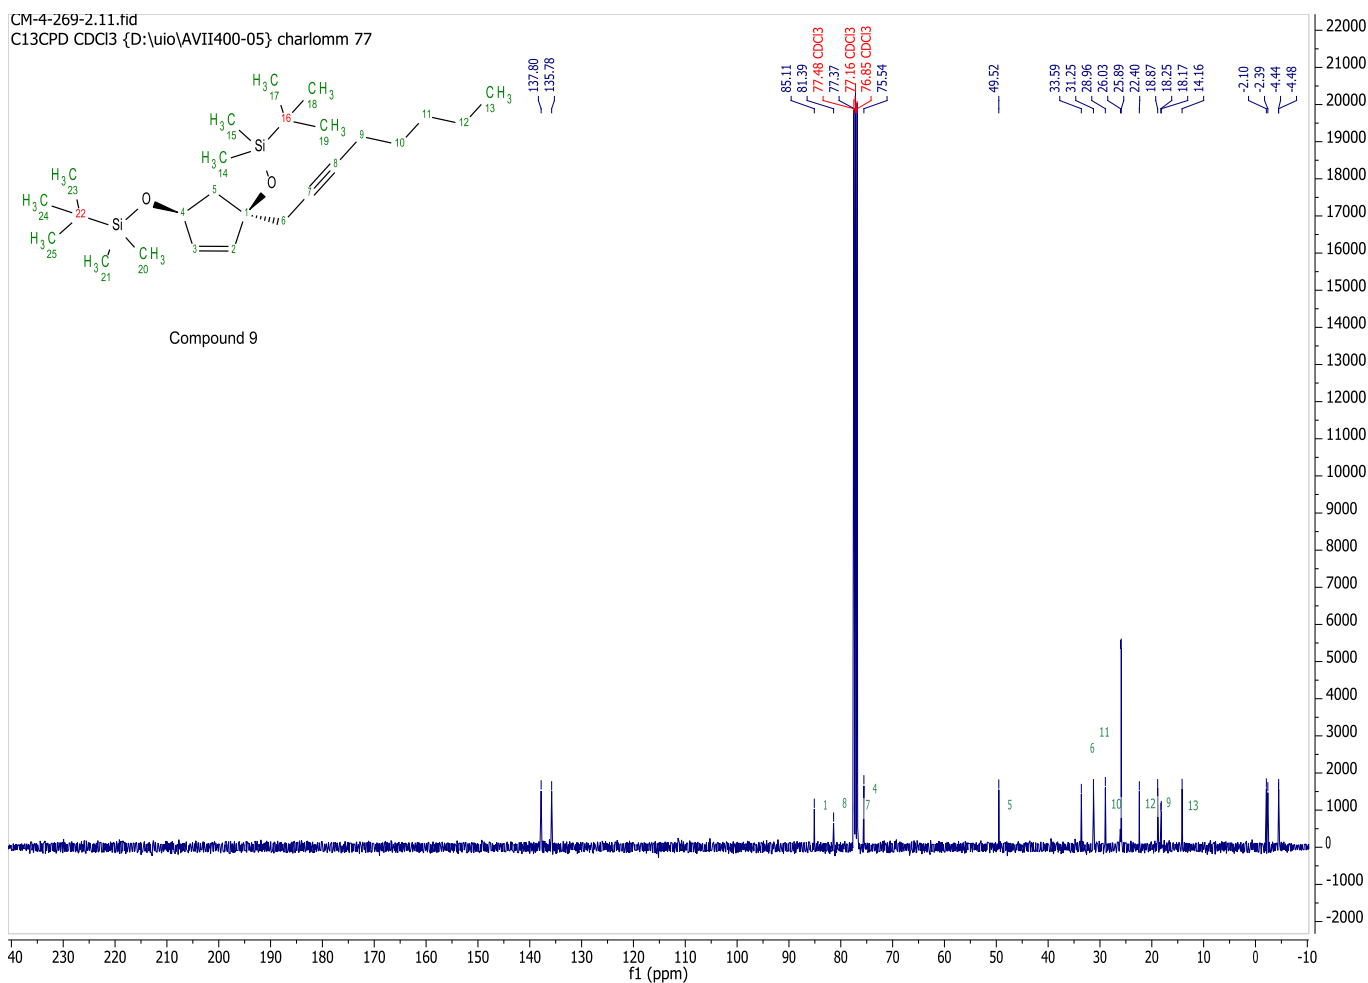

CM-3-210-2-1.20.fid  
 PROTON128 CDCl3 {D:\uio\AVII400-05} charlomm 112

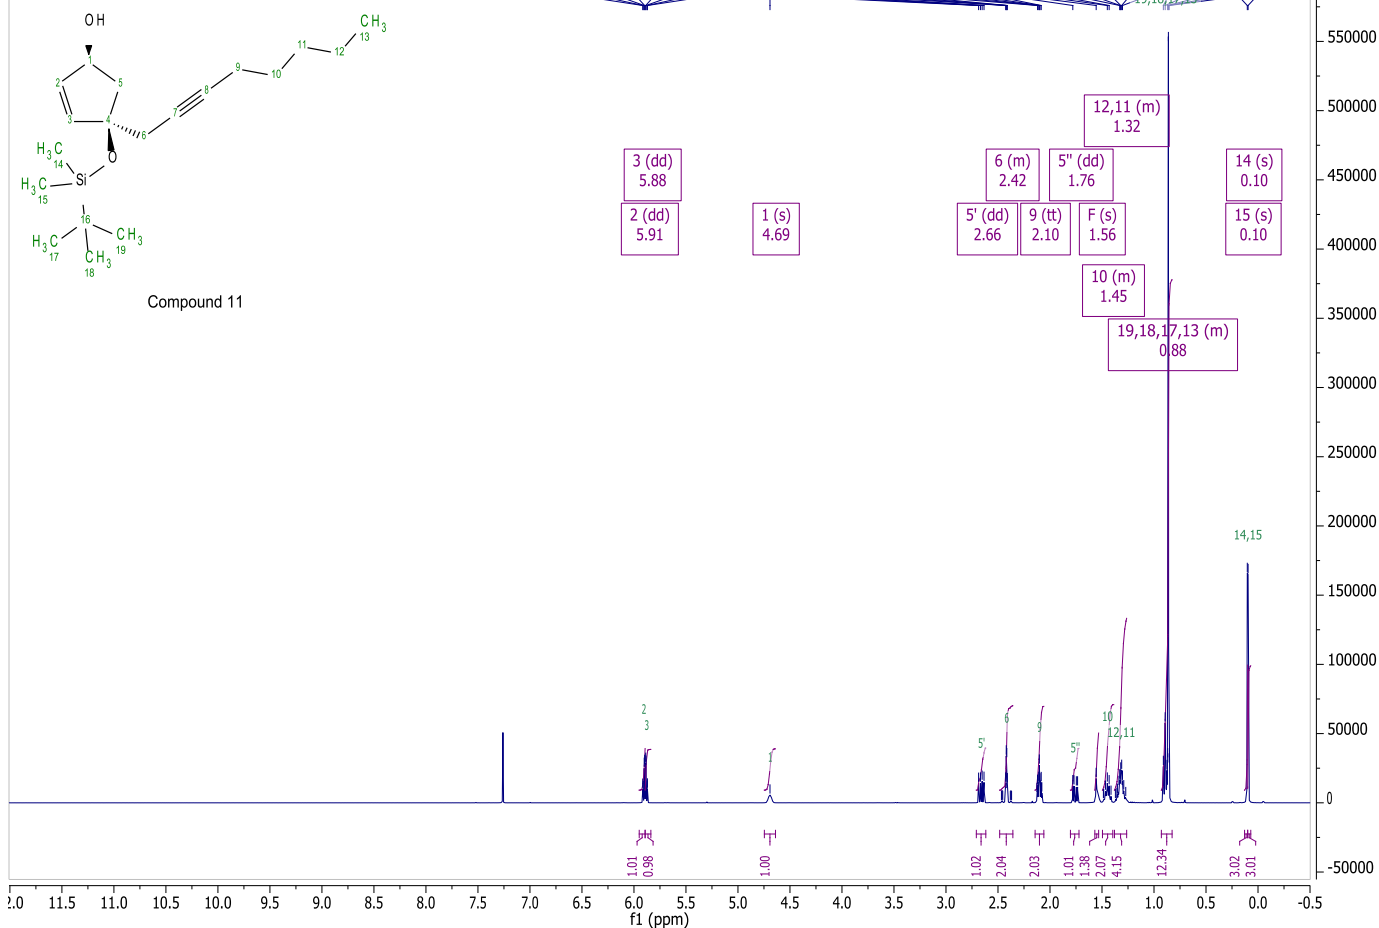

CM-3-210-2-1.21.fid  
 C13CPD CDCl3 {D:\uio\AVII400-05} charlomm 112

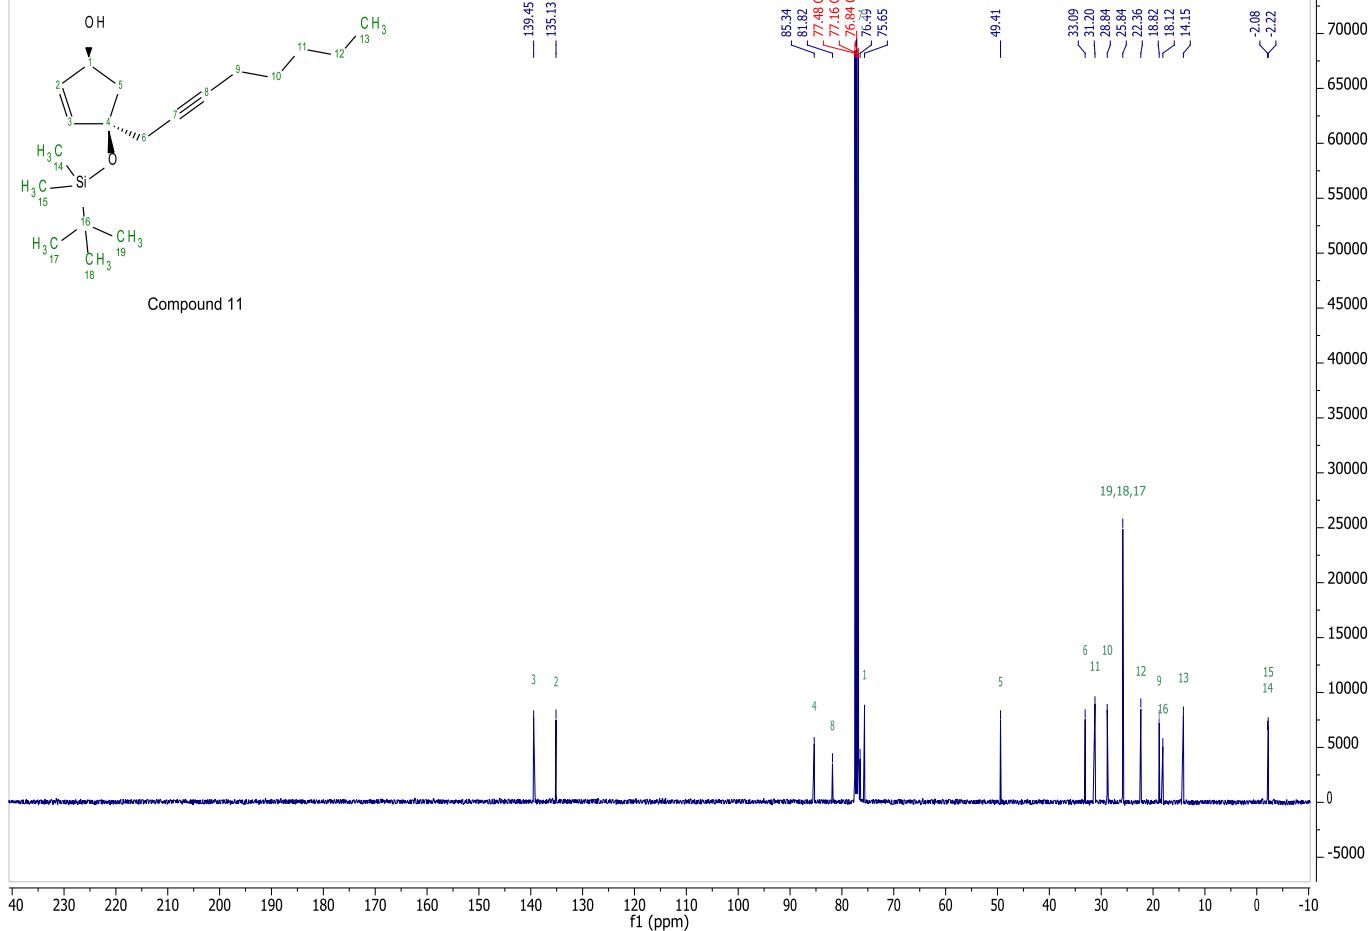

CM-3-215-2.10.fid  
 PROTON CDCI3 {D:\uio\AVII400-05} charlomm 28

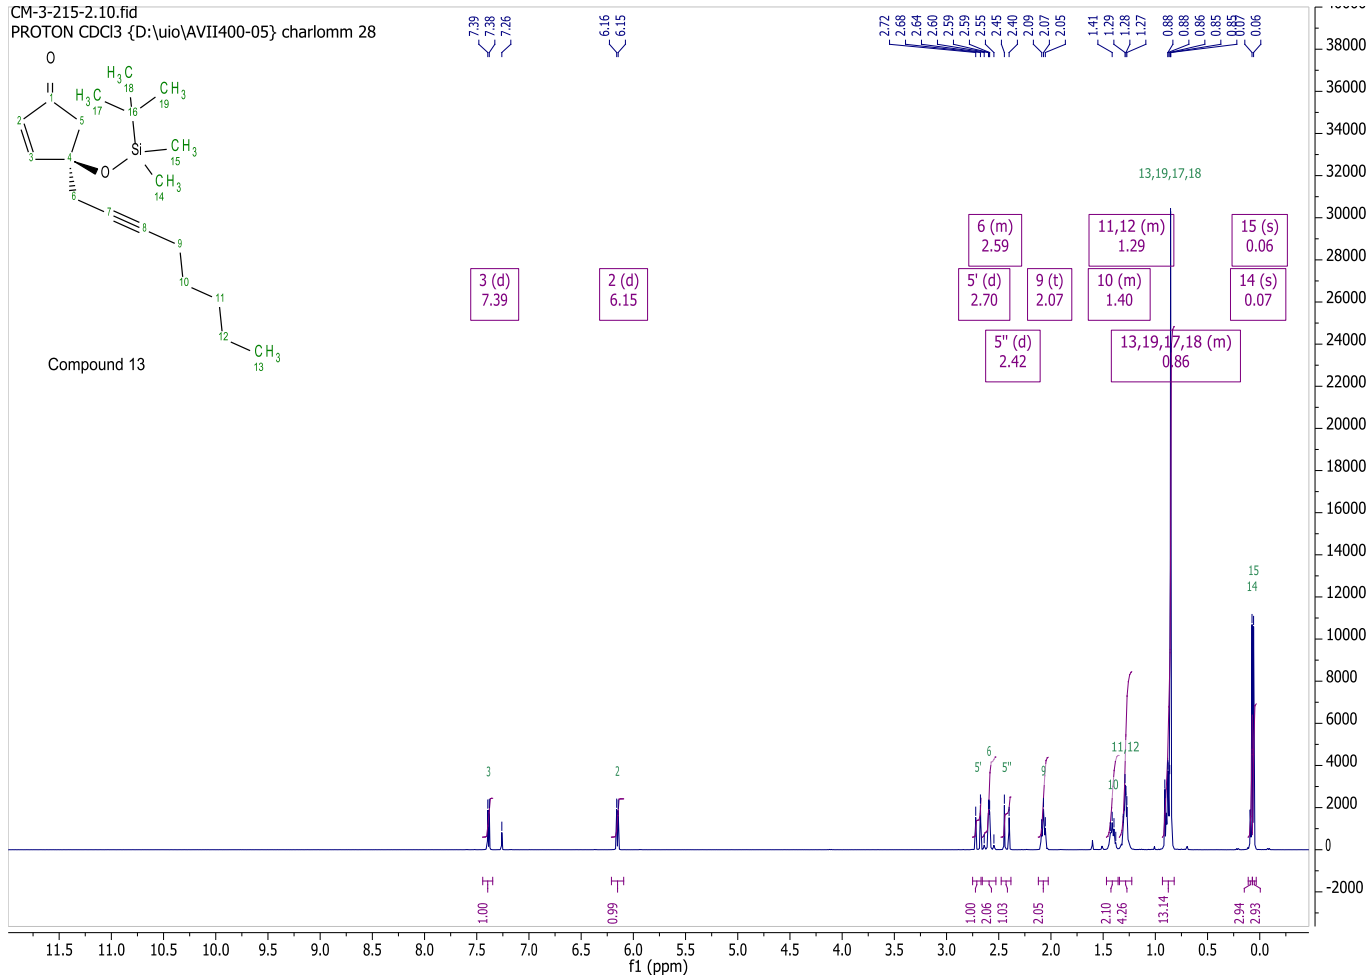

CM-3-204-2.11.fid  
 C13CPD CDCI3 {D:\uio\AVII400-05} charlomm 22

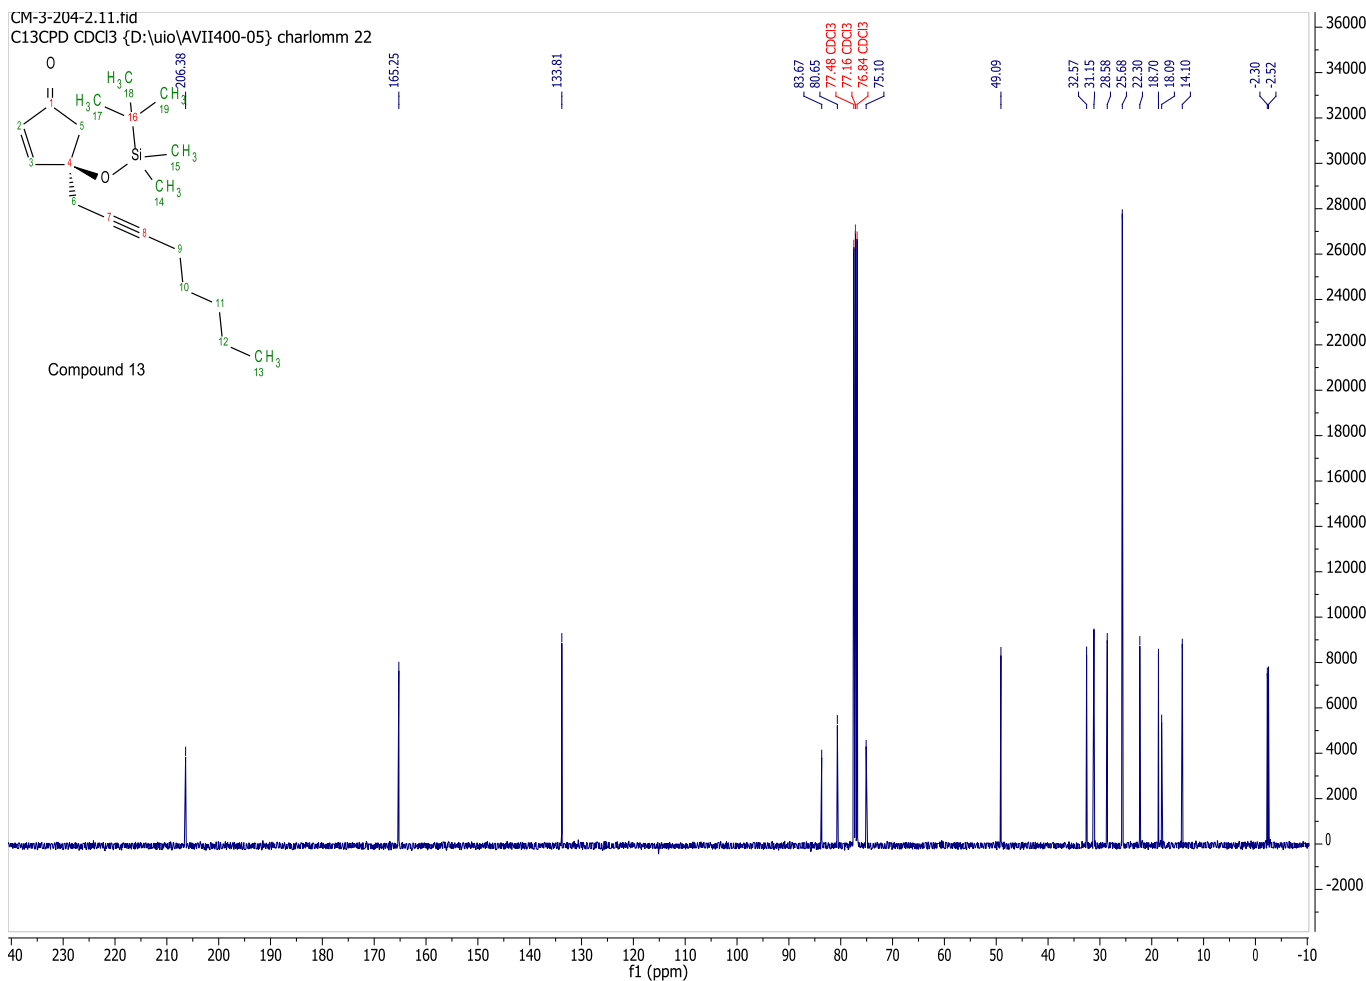

CM-4-253-4.10.fid  
 PROTON CDCl3 {D:\uio\AVII400-05} charlomm 88

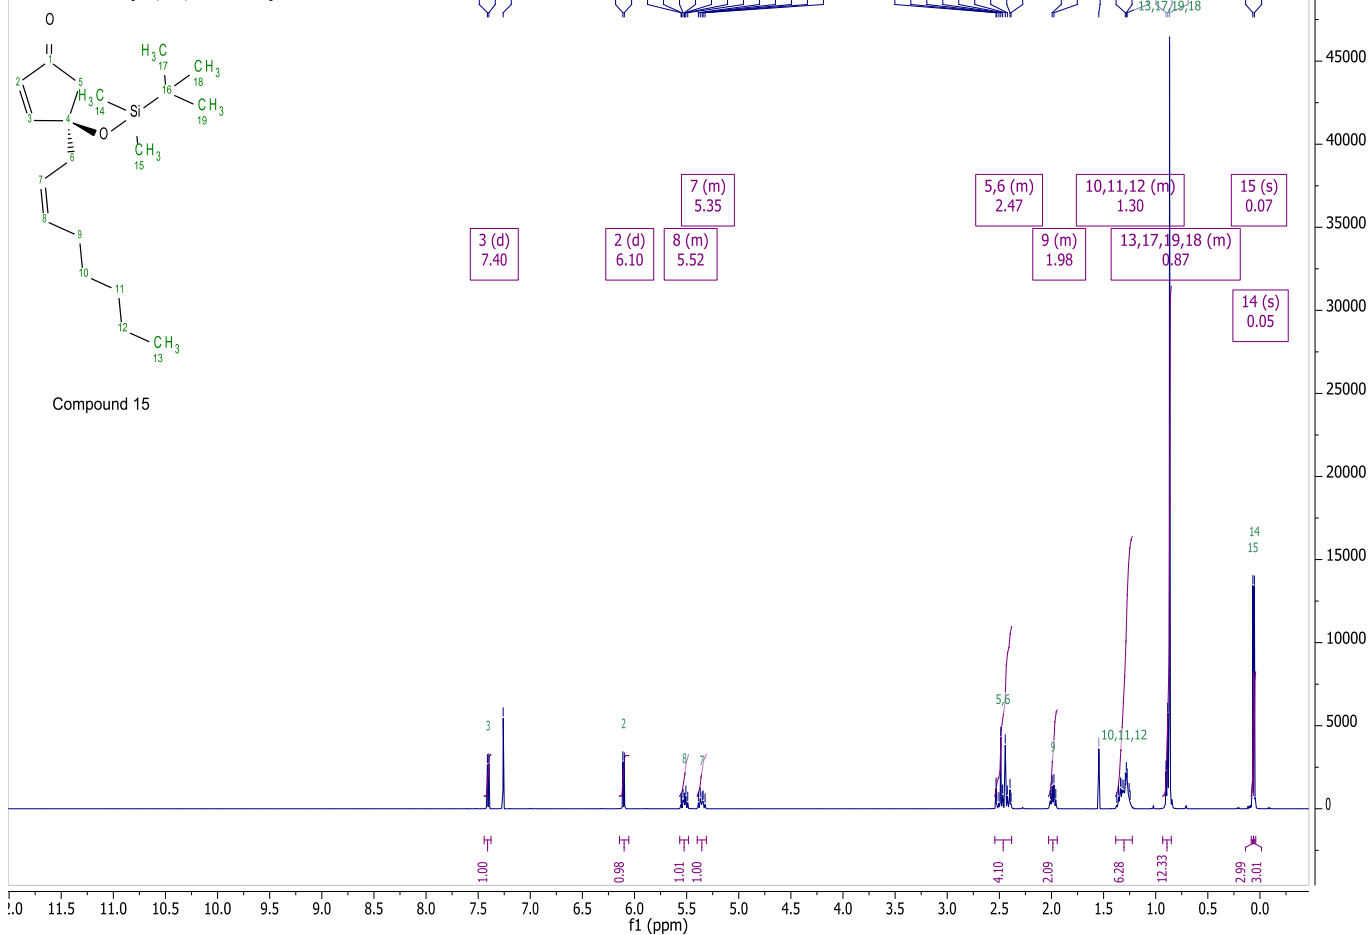

CM-4-253-4.21.fid  
 C13CPD CDCl3 {D:\uio\AVII400-05} charlomm 10

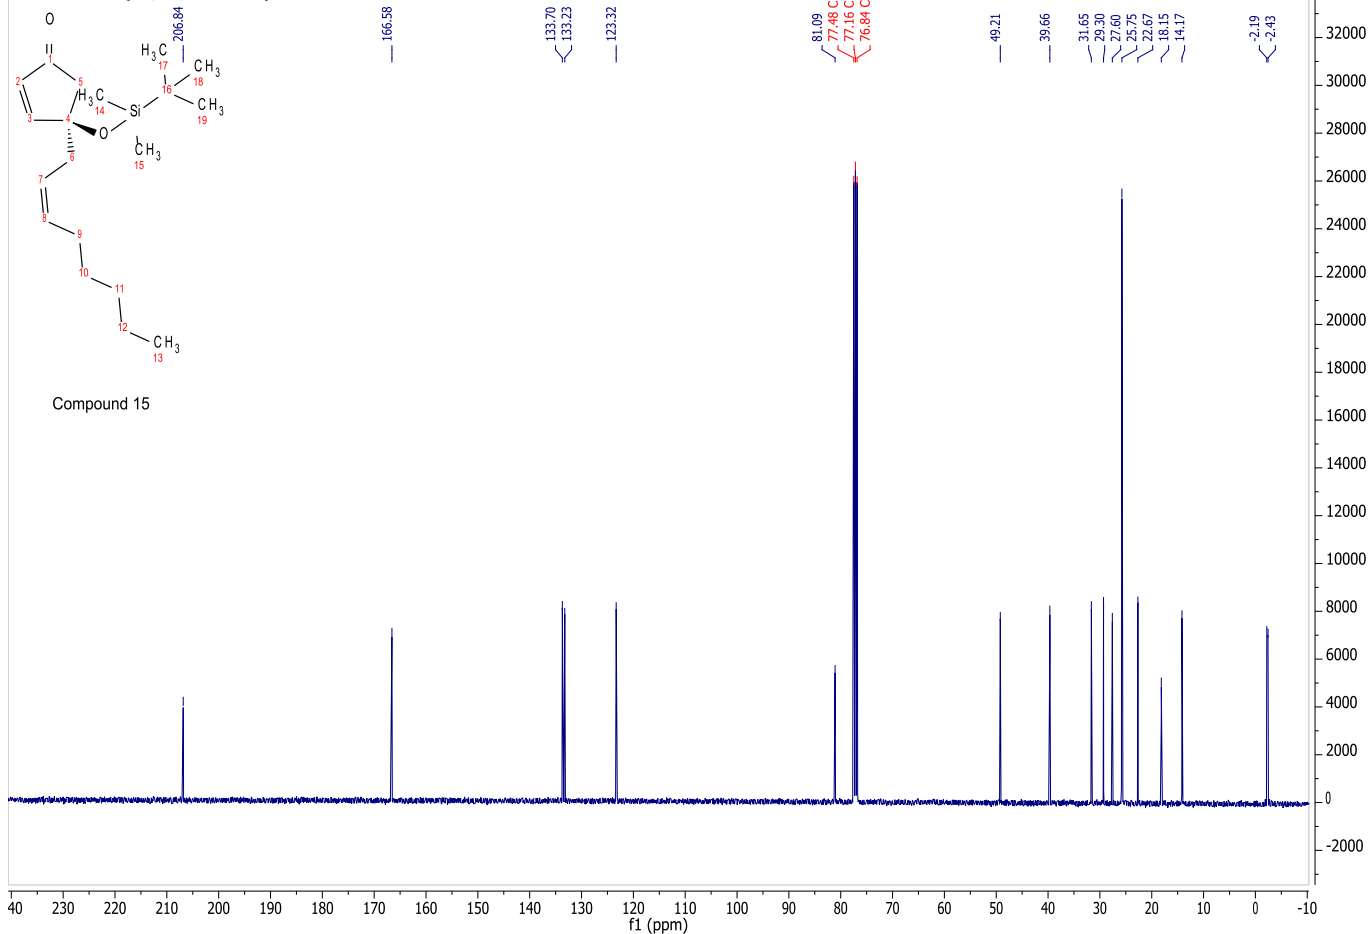

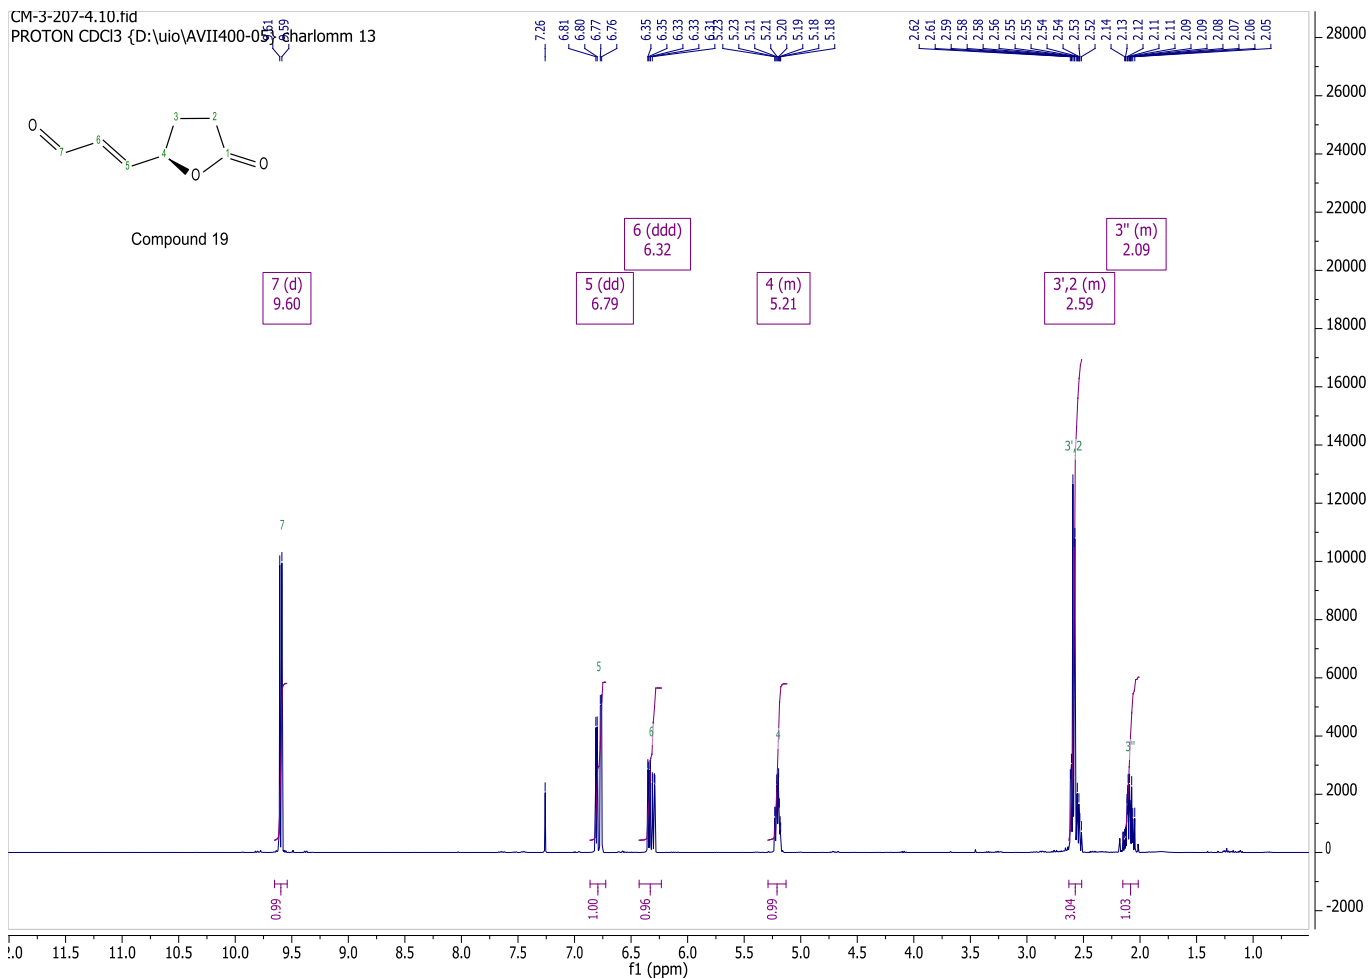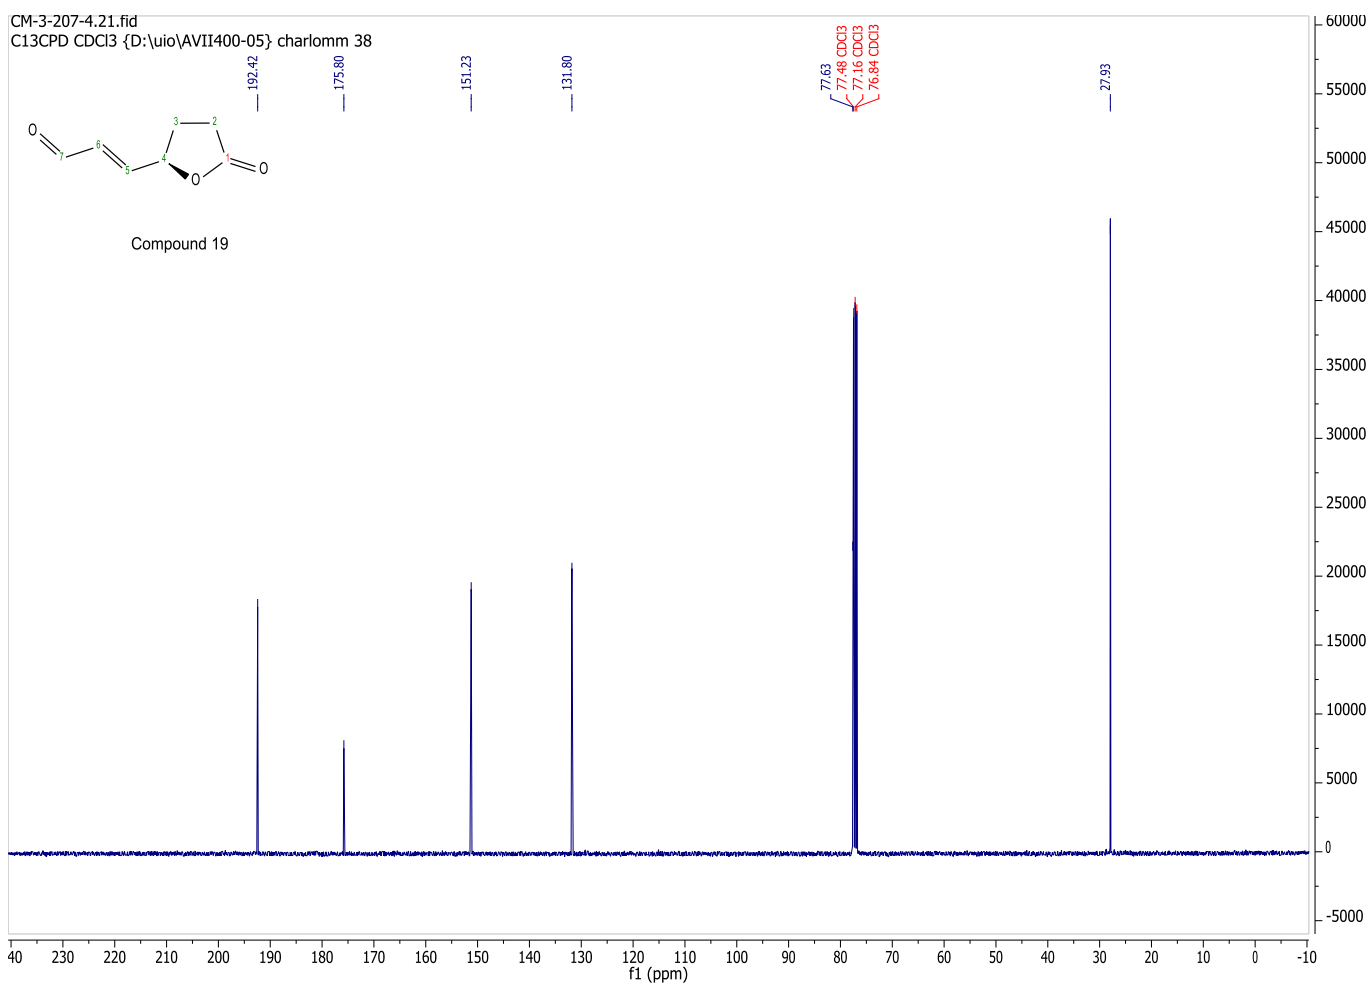



CM-4-229-4-4.10.fid  
 PROTON CDCl<sub>3</sub> {D:\uio\AVII400-05} charlomm 68

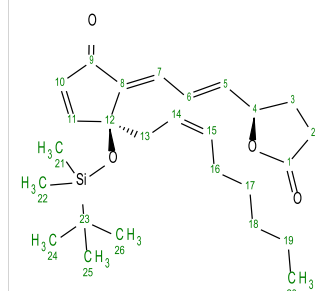

Compound 20

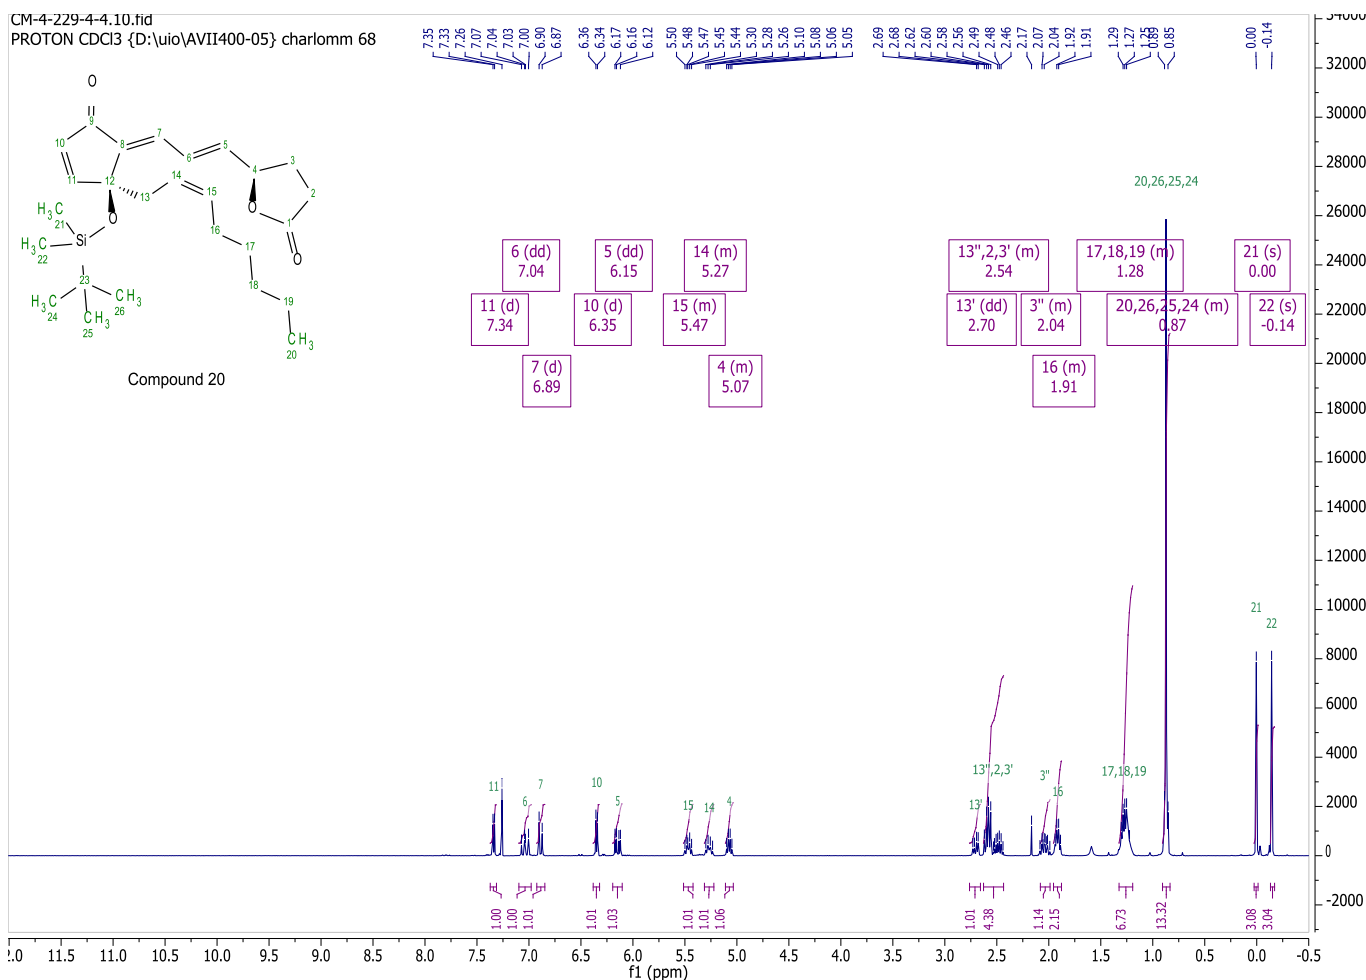

CM-4-229-4-4.11.fid  
 C13CPD CDCl<sub>3</sub> {D:\uio\AVII400-05} charlomm 68

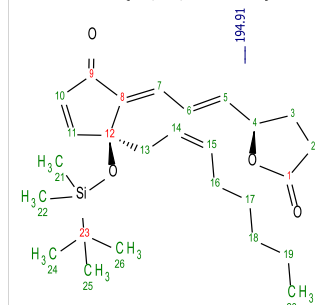

Compound 20

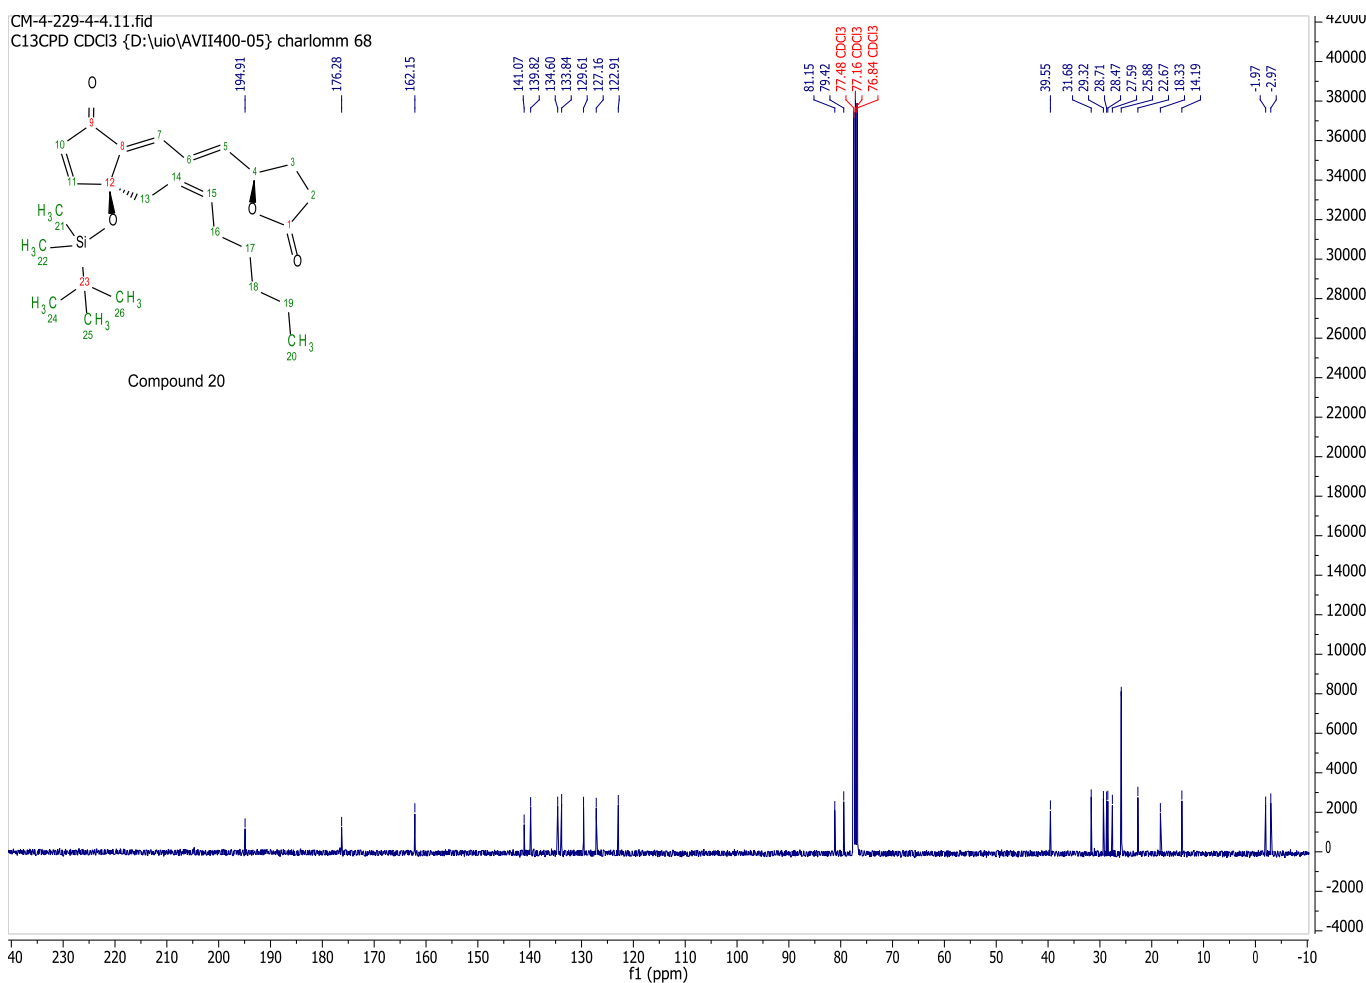

CM-4-274-1.10.fid

PROTON CDCl<sub>3</sub> {D:\uio\AVII400-05} charlomm 13

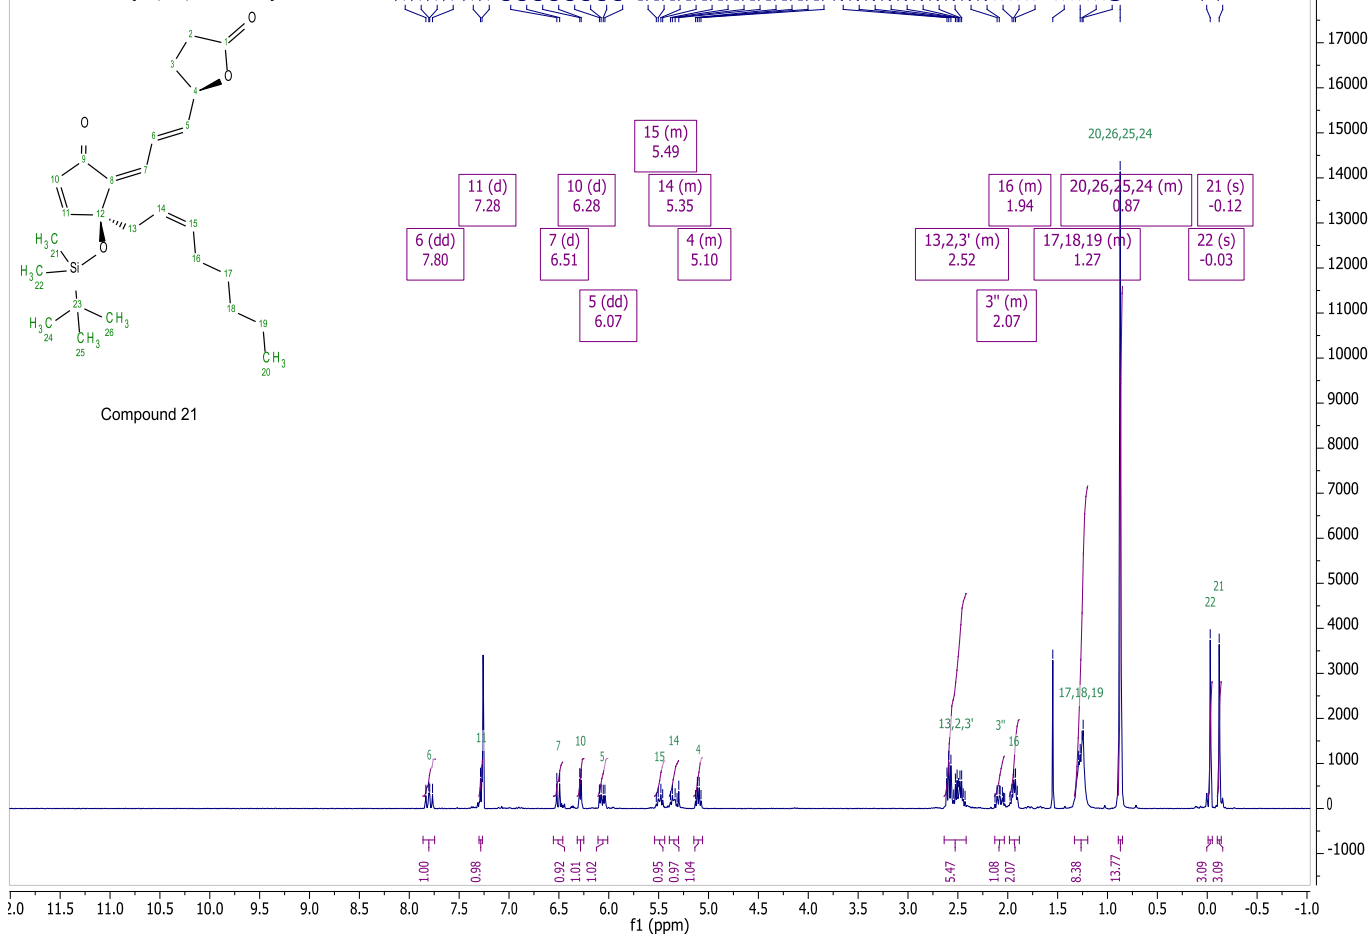

CM-4-261-8-2.11.fid

C13CPD CDCl<sub>3</sub> {D:\uio\AVII400-05} charlomm 41

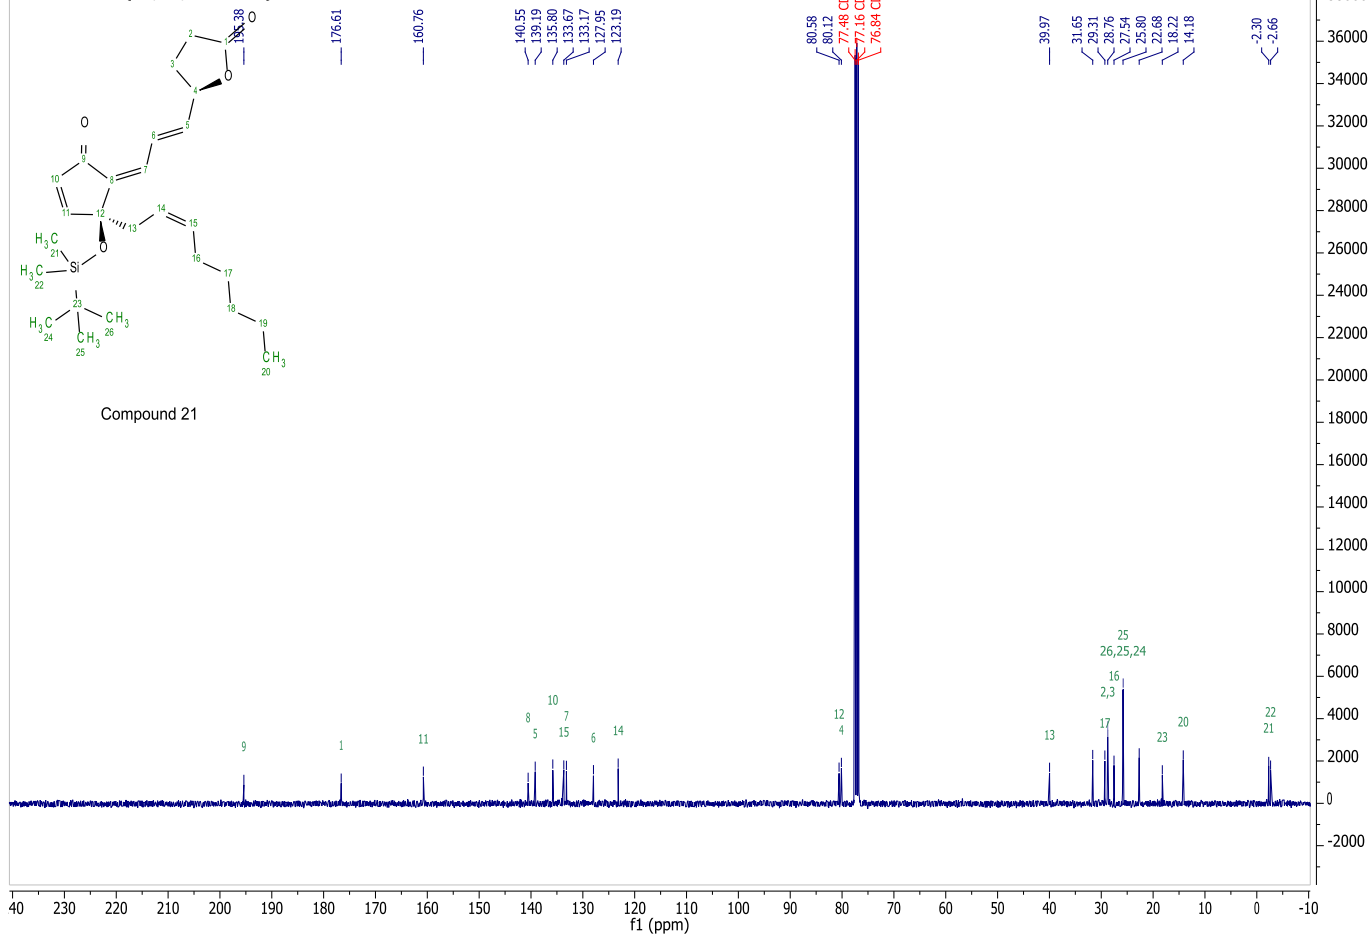

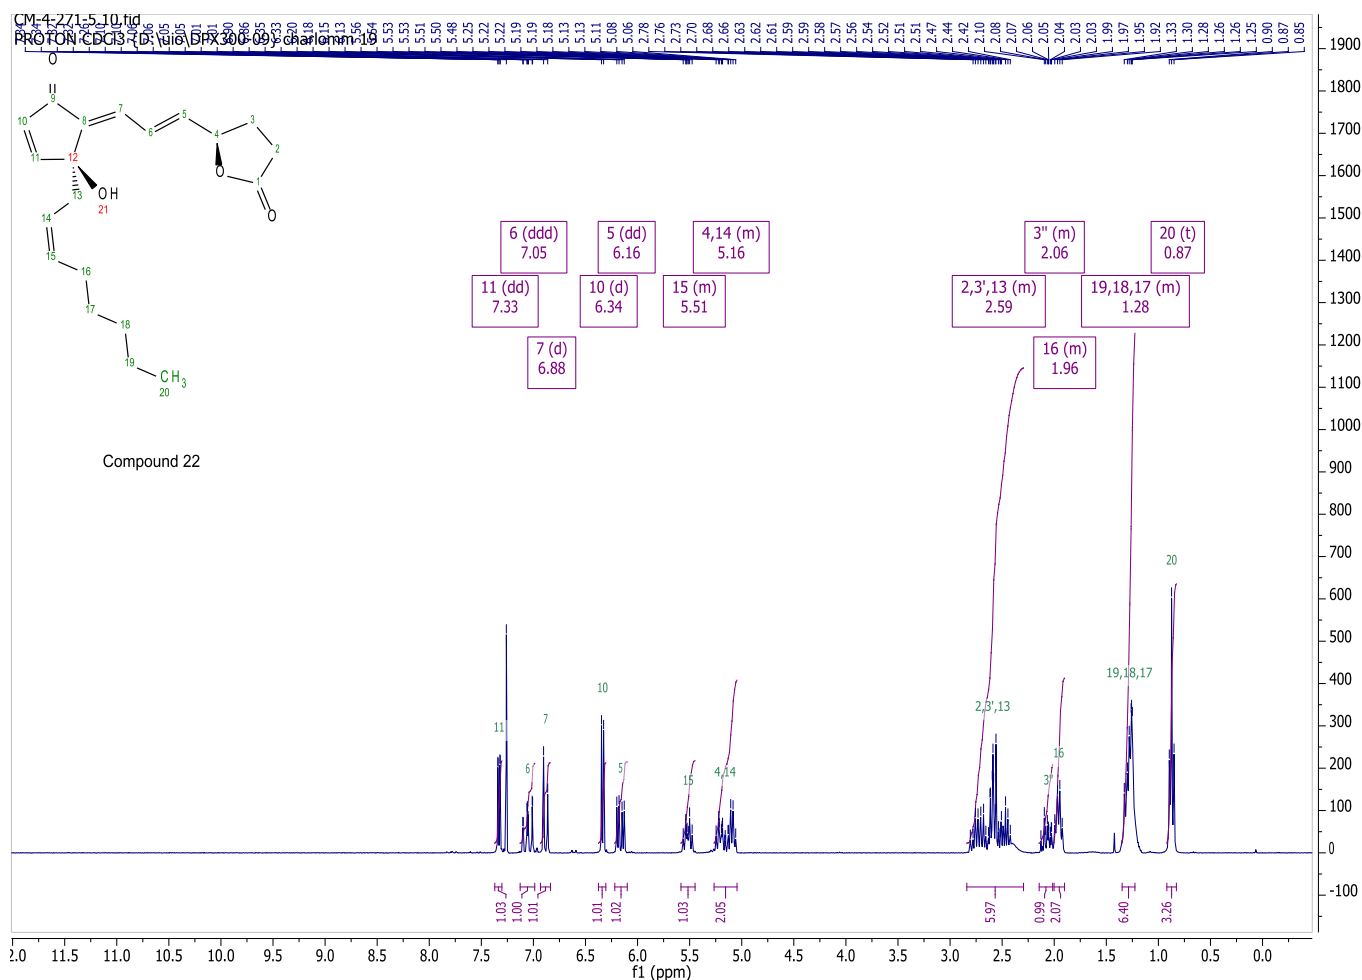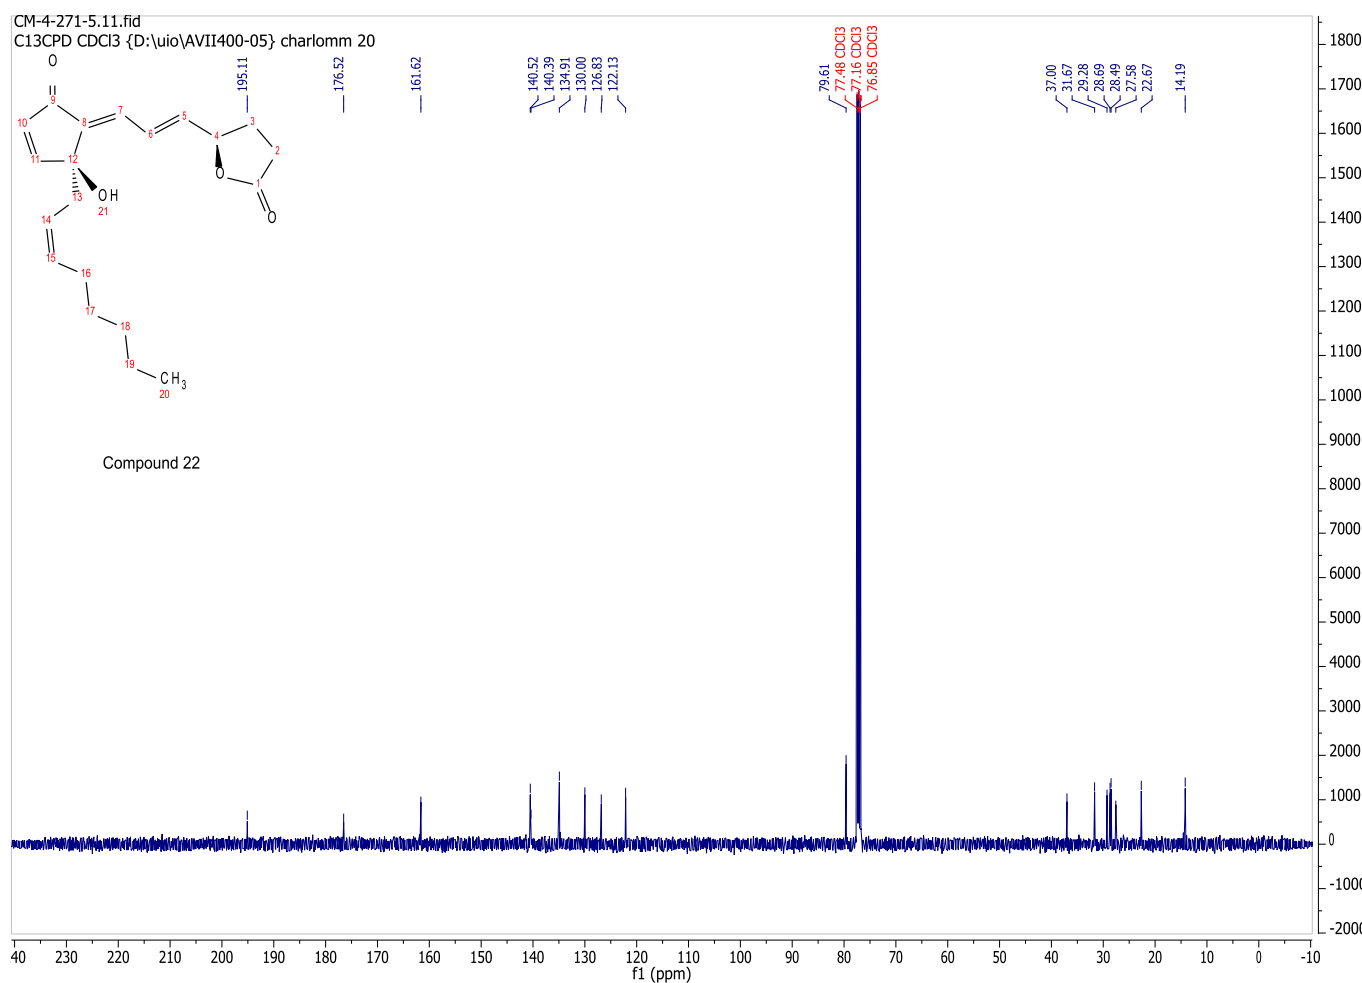

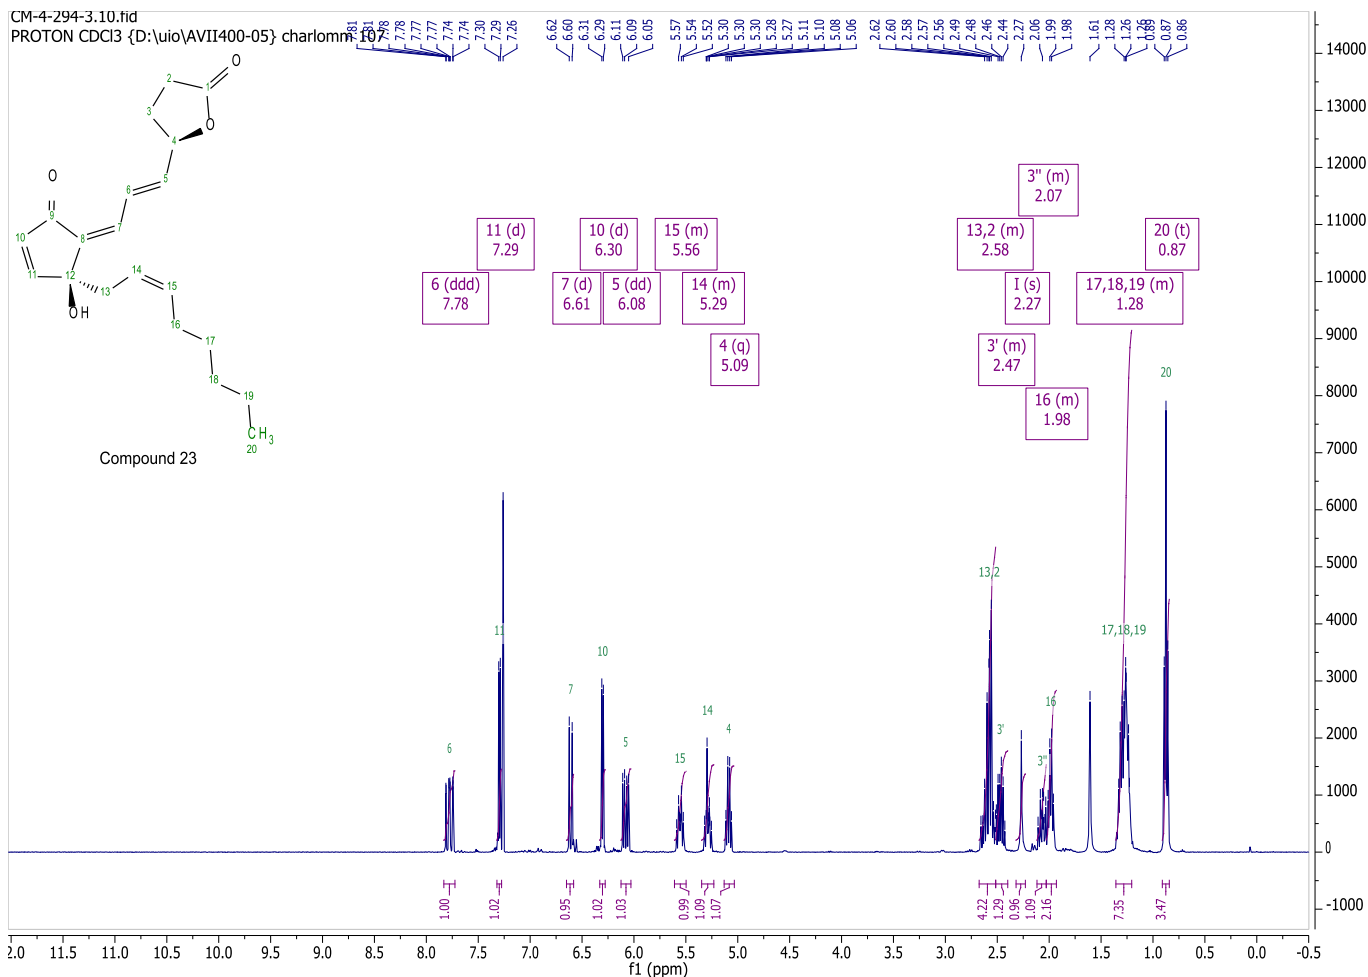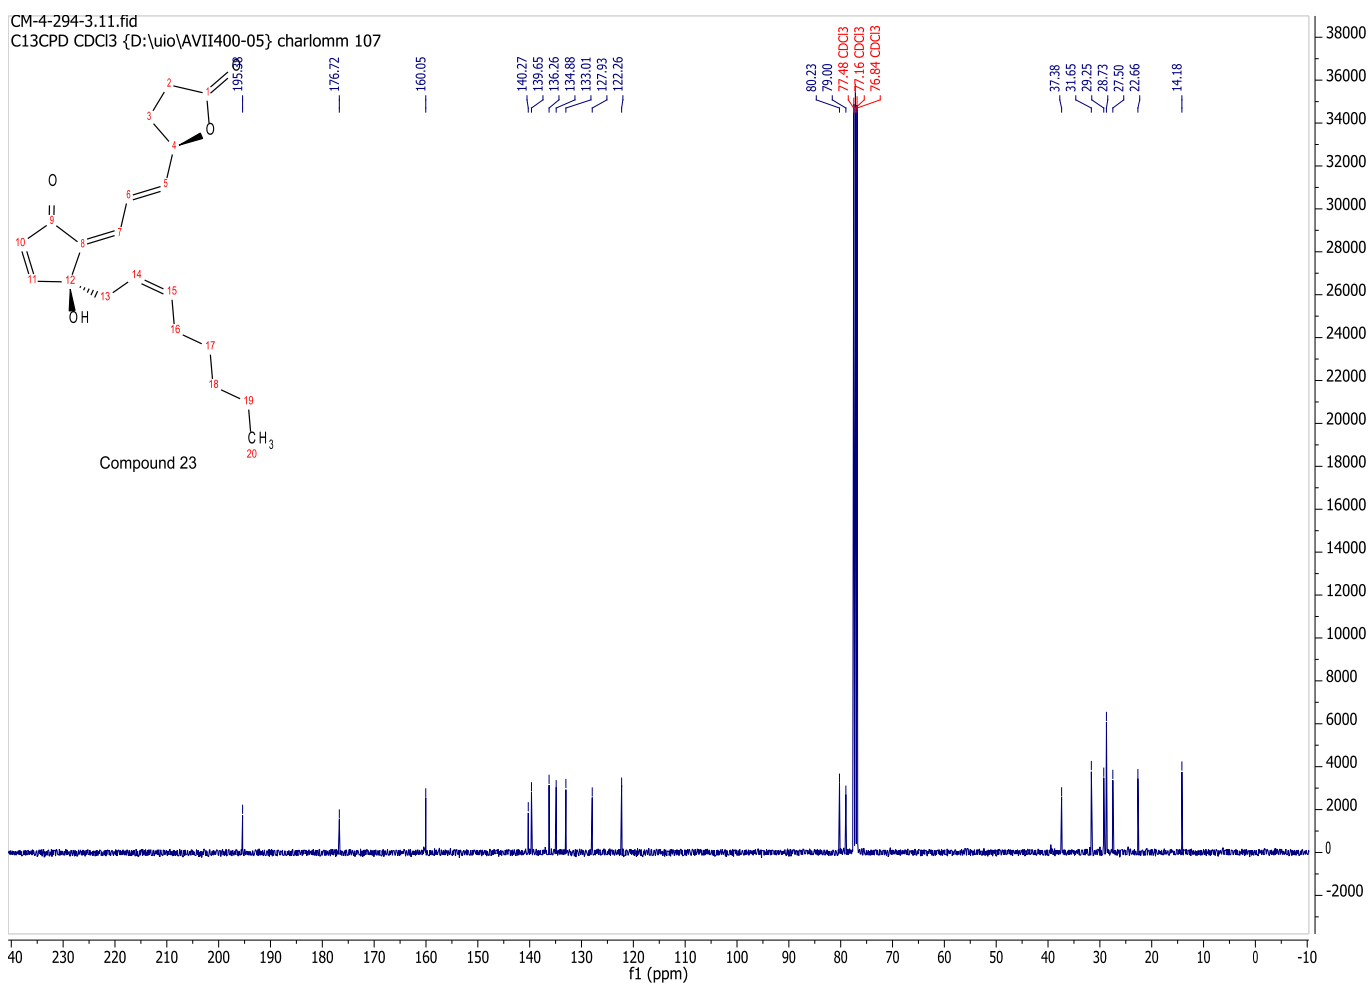

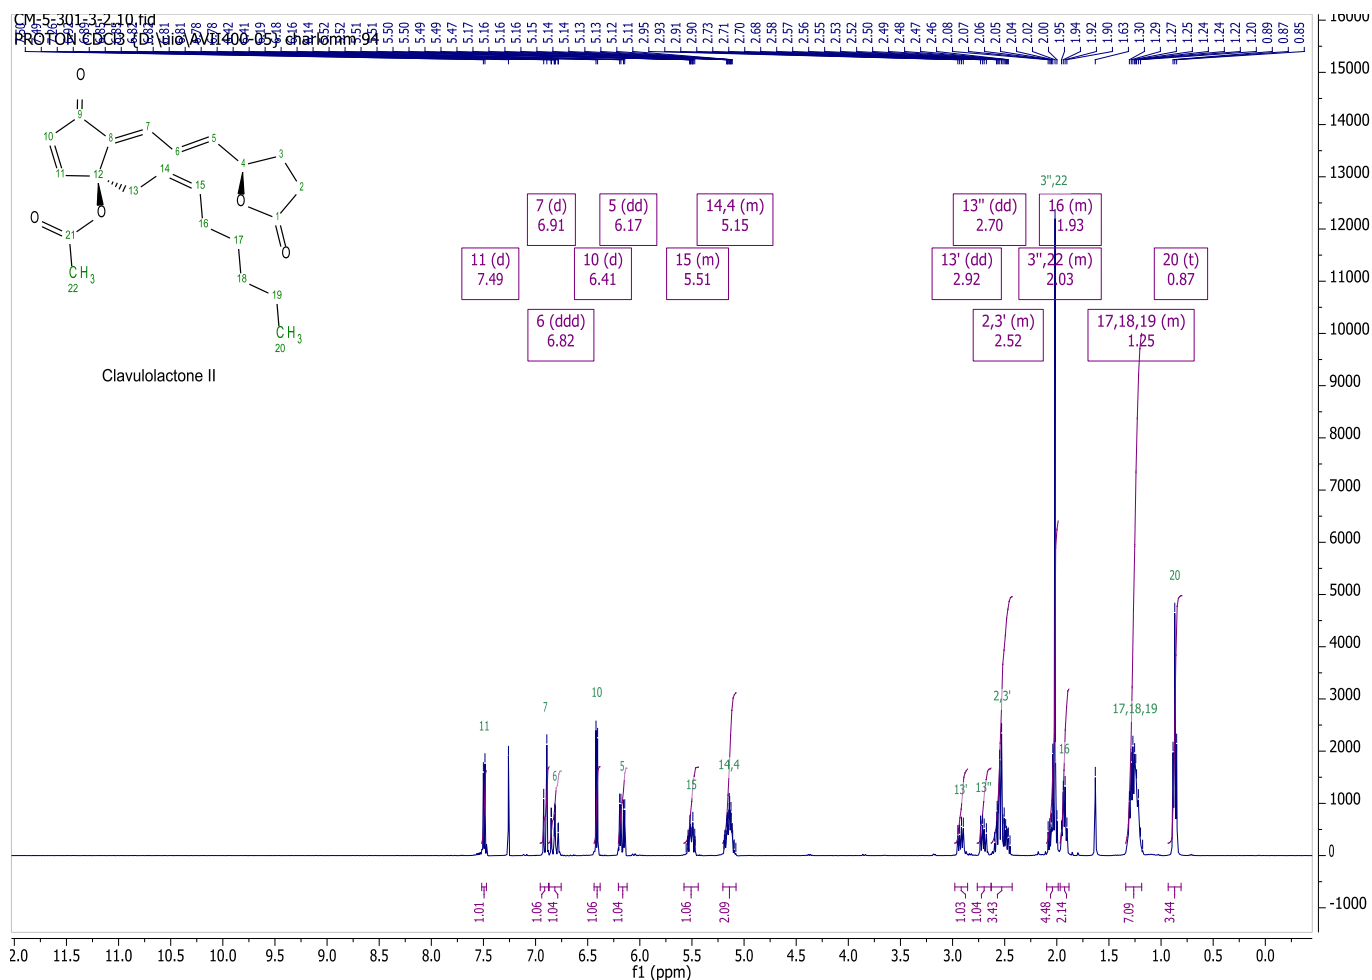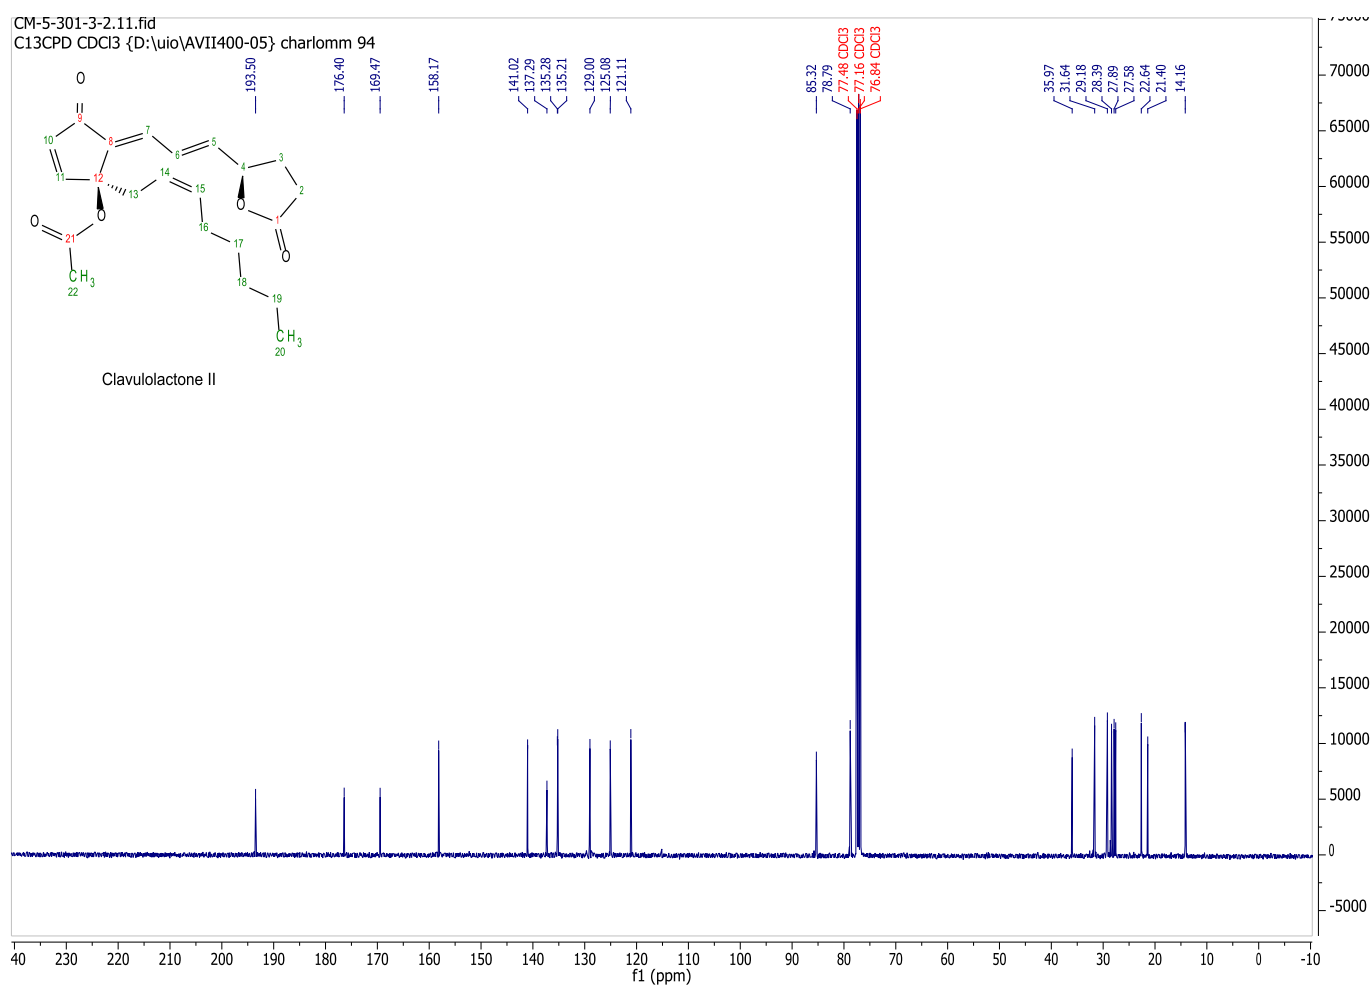

CM-4-264-4.10.fid  
 PROTON CDCl3 {D:\uio\AVII400-05} charlomm 9

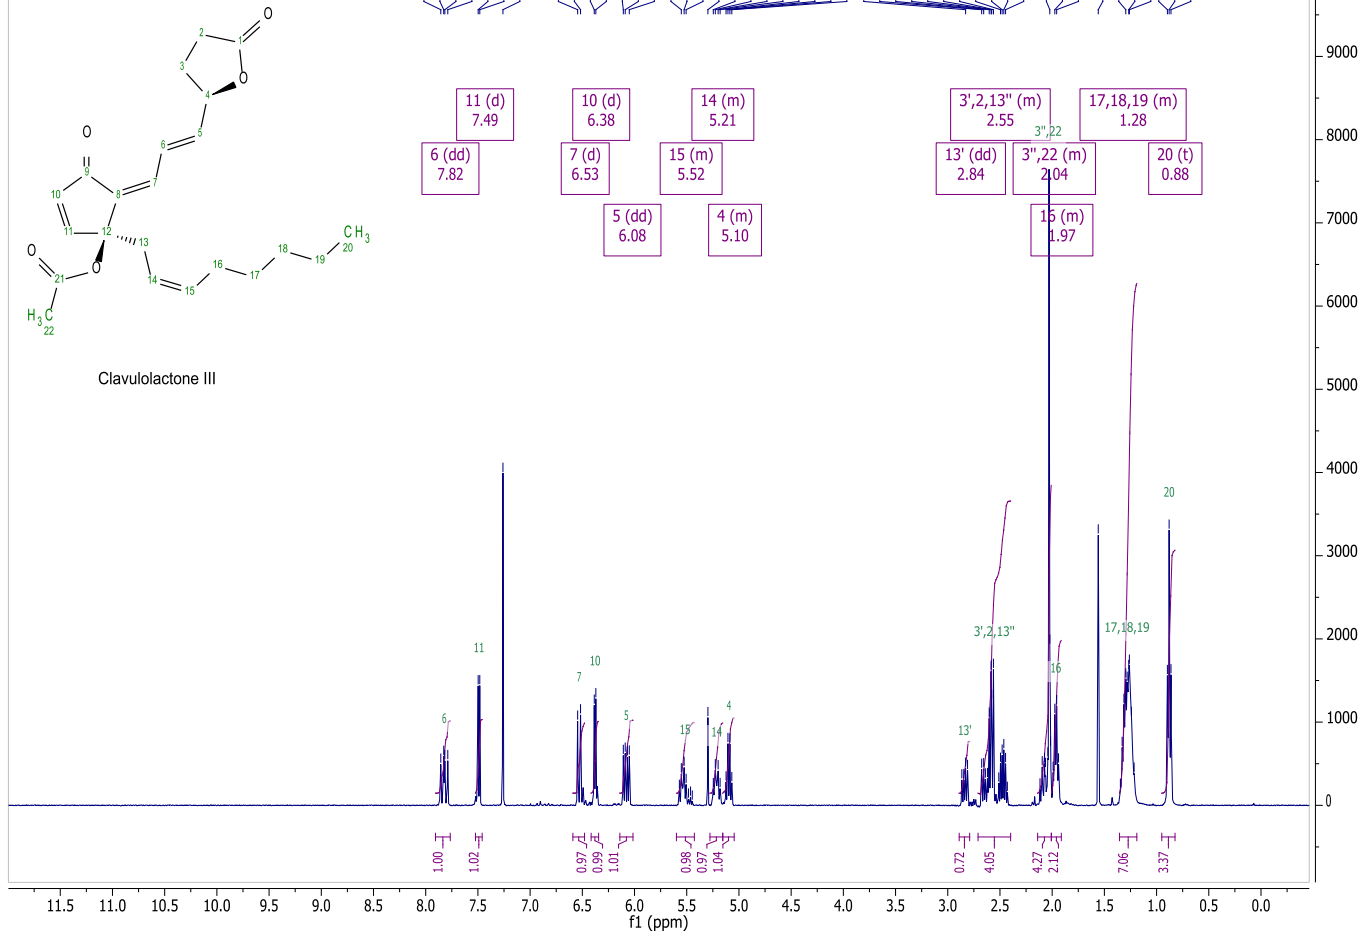

CM-4-264-4.11.fid  
 C13CPD CDCl3 {D:\uio\AVII400-05} charlomm 9

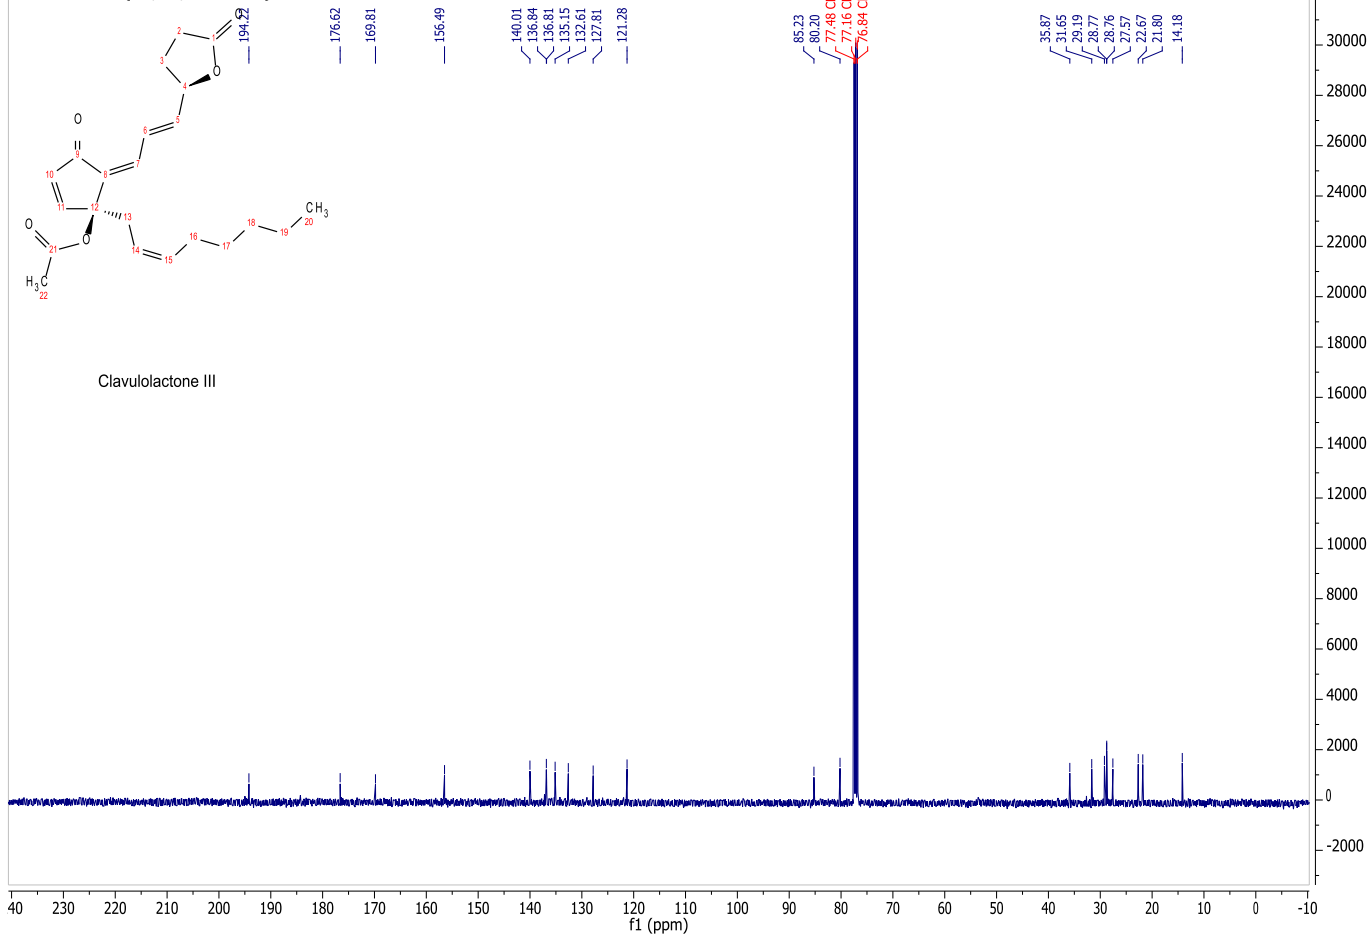

Supplement: c5ob00074b1.pdf [file c5ob00074b1.pdf]
